# Supplementary material for: FOURIER TRANSFORM SPECTROMETRY: THE VISIBLE SPECTRUM OF YO
Source: Oxford University Press journal article supplement (doi:10.1242/dev.078675), 1977-01-01
Supplement: dev078675figs1.pdf [file dev078675figs1.pdf]

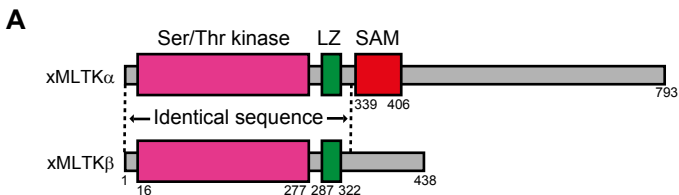

**B**

| xMLTK $\alpha$ |                                                                | xMLTK $\beta$  |                                                                |
|----------------|----------------------------------------------------------------|----------------|----------------------------------------------------------------|
| Homo sapiens   | 1 MSERGRSFVQIRFDLDFENCGGSGFGSVYRANKSDQREAVVKKLLKIEKAEILISL     | Homo sapiens   | 1 MSERGRSFVQIRFDLDFENCGGSGFGSVYRANKSDQREAVVKKLLKIEKAEILISL     |
| Mus musculus   | 1 MSERGRSFVQIRFDLDFENCGGSGFGSVYRANKSDQREAVVKKLLKIEKAEILISL     | Mus musculus   | 1 MSERGRSFVQIRFDLDFENCGGSGFGSVYRANKSDQREAVVKKLLKIEKAEILISL     |
| Gallus gallus  | 1 MSERGRSFVQIRFDLDFENCGGSGFGSVYRANKSDQREAVVKKLLKIEKAEILISL     | Xenopus laevis | 1 MSERGRSFVQIRFDLDFENCGGSGFGSVYRANKSDQREAVVKKLLKIEKAEILISL     |
| Xenopus laevis | 1 MSERGRSFVQIRFDLDFENCGGSGFGSVYRANKSDQREAVVKKLLKIEKAEILISL     |                |                                                                |
| Danio rerio    | 1 MSERGRSFVQIRFDLDFENCGGSGFGSVYRANKSDQREAVVKKLLKIEKAEILISL     |                |                                                                |
|                |                                                                |                |                                                                |
| Homo sapiens   | 61 SRHNIIQFYGVILPEPNYIVTEYASGSLVDYINSRSEMMUMHIMHAWDVARGMHY     | Homo sapiens   | 61 SRHNIIQFYGVILPEPNYIVTEYASGSLVDYINSRSEMMUMHIMHAWDVARGMHY     |
| Mus musculus   | 61 SRHNIIQFYGVILPEPNYIVTEYASGSLVDYINSRSEMMUMHIMHAWDVARGMHY     | Mus musculus   | 61 SRHNIIQFYGVILPEPNYIVTEYASGSLVDYINSRSEMMUMHIMHAWDVARGMHY     |
| Gallus gallus  | 61 SRHNIIQFYGVILPEPNYIVTEYASGSLVDYINSRSEMMUMHIMHAWDVARGMHY     | Xenopus laevis | 61 SRHNIIQFYGVILPEPNYIVTEYASGSLVDYINSRSEMMUMHIMHAWDVARGMHY     |
| Xenopus laevis | 61 SRHNIIQFYGVILPEPNYIVTEYASGSLVDYINSRSEMMUMHIMHAWDVARGMHY     |                |                                                                |
| Danio rerio    | 61 SRHNIIQFYGVILPEPNYIVTEYASGSLVDYINSRSEMMUMHIMHAWDVARGMHY     |                |                                                                |
|                |                                                                |                |                                                                |
| Homo sapiens   | 121 LRMEAFVIVHRLDKSRNVVLAAGVILKICDFGASRFRPHHTHMSLVGTFPMAPEVIQS | Homo sapiens   | 121 LRMEAFVIVHRLDKSRNVVLAAGVILKICDFGASRFRPHHTHMSLVGTFPMAPEVIQS |
| Mus musculus   | 121 LRMEAFVIVHRLDKSRNVVLAAGVILKICDFGASRFRPHHTHMSLVGTFPMAPEVIQS | Mus musculus   | 121 LRMEAFVIVHRLDKSRNVVLAAGVILKICDFGASRFRPHHTHMSLVGTFPMAPEVIQS |
| Gallus gallus  | 121 LRMEAFVIVHRLDKSRNVVLAAGVILKICDFGASRFRPHHTHMSLVGTFPMAPEVIQS | Xenopus laevis | 121 LRMEAFVIVHRLDKSRNVVLAAGVILKICDFGASRFRPHHTHMSLVGTFPMAPEVIQS |
| Xenopus laevis | 121 LRMEAFVIVHRLDKSRNVVLAAGVILKICDFGASRFRPHHTHMSLVGTFPMAPEVIQS |                |                                                                |
| Danio rerio    | 121 LRMEAFVIVHRLDKSRNVVLAAGVILKICDFGASRFRPHHTHMSLVGTFPMAPEVIQS |                |                                                                |
|                |                                                                |                |                                                                |
| Homo sapiens   | 181 LPVSETCDTISYGVVHEMLIRNPFKLEGLQVAVLVVERELTIPSSCFRFAELRL     | Homo sapiens   | 181 LPVSETCDTISYGVVHEMLIRNPFKLEGLQVAVLVVERELTIPSSCFRFAELRL     |
| Mus musculus   | 181 LPVSETCDTISYGVVHEMLIRNPFKLEGLQVAVLVVERELTIPSSCFRFAELRL     | Mus musculus   | 181 LPVSETCDTISYGVVHEMLIRNPFKLEGLQVAVLVVERELTIPSSCFRFAELRL     |
| Gallus gallus  | 181 LPVSETCDTISYGVVHEMLIRNPFKLEGLQVAVLVVERELTIPSSCFRFAELRL     | Xenopus laevis | 181 LPVSETCDTISYGVVHEMLIRNPFKLEGLQVAVLVVERELTIPSSCFRFAELRL     |
| Xenopus laevis | 181 LPVSETCDTISYGVVHEMLIRNPFKLEGLQVAVLVVERELTIPSSCFRFAELRL     |                |                                                                |
| Danio rerio    | 181 LPVSETCDTISYGVVHEMLIRNPFKLEGLQVAVLVVERELTIPSSCFRFAELRL     |                |                                                                |
|                |                                                                |                |                                                                |
| Homo sapiens   | 241 QWEADAKRRPFQKINSHLESMSNDLSLPPDCNSFLHNKAERCEITLRLRLRLERD    | Homo sapiens   | 241 QWEADAKRRPFQKINSHLESMSNDLSLPPDCNSFLHNKAERCEITLRLRLRLERD    |
| Mus musculus   | 241 QWEADAKRRPFQKINSHLESMSNDLSLPPDCNSFLHNKAERCEITLRLRLRLERD    | Mus musculus   | 241 QWEADAKRRPFQKINSHLESMSNDLSLPPDCNSFLHNKAERCEITLRLRLRLERD    |
| Gallus gallus  | 241 QWEADAKRRPFQKINSHLESMSNDLSLPPDCNSFLHNKAERCEITLRLRLRLERD    | Xenopus laevis | 241 QWEADAKRRPFQKINSHLESMSNDLSLPPDCNSFLHNKAERCEITLRLRLRLERD    |
| Xenopus laevis | 241 QWEADAKRRPFQKINSHLESMSNDLSLPPDCNSFLHNKAERCEITLRLRLRLERD    |                |                                                                |
| Danio rerio    | 241 QWEADAKRRPFQKINSHLESMSNDLSLPPDCNSFLHNKAERCEITLRLRLRLERD    |                |                                                                |
|                |                                                                |                |                                                                |
| Homo sapiens   | 301 LSREQLKERERLRLKRWKRLIQESRFLPSEFLQWTDVIVYQVILVRKGSVAE       | Homo sapiens   | 301 LSREQLKERERLRLKRWKRLIQESRFLPSEFLQWTDVIVYQVILVRKGSVAE       |
| Mus musculus   | 301 LSREQLKERERLRLKRWKRLIQESRFLPSEFLQWTDVIVYQVILVRKGSVAE       | Mus musculus   | 301 LSREQLKERERLRLKRWKRLIQESRFLPSEFLQWTDVIVYQVILVRKGSVAE       |
| Gallus gallus  | 301 LSREQLKERERLRLKRWKRLIQESRFLPSEFLQWTDVIVYQVILVRKGSVAE       | Xenopus laevis | 301 LSREQLKERERLRLKRWKRLIQESRFLPSEFLQWTDVIVYQVILVRKGSVAE       |
| Xenopus laevis | 301 LSREQLKERERLRLKRWKRLIQESRFLPSEFLQWTDVIVYQVILVRKGSVAE       |                |                                                                |
| Danio rerio    | 301 LSREQLKERERLRLKRWKRLIQESRFLPSEFLQWTDVIVYQVILVRKGSVAE       |                |                                                                |
|                |                                                                |                |                                                                |
| Homo sapiens   | 361 MSVYSLRKENNITGRLLLRDQDRLGIVSRGHITRQPIEKLTHDVNLPHFFPEI      | Homo sapiens   | 361 MSVYSLRKENNITGRLLLRDQDRLGIVSRGHITRQPIEKLTHDVNLPHFFPEI      |
| Mus musculus   | 361 MSVYSLRKENNITGRLLLRDQDRLGIVSRGHITRQPIEKLTHDVNLPHFFPEI      | Mus musculus   | 361 MSVYSLRKENNITGRLLLRDQDRLGIVSRGHITRQPIEKLTHDVNLPHFFPEI      |
| Gallus gallus  | 361 MSVYSLRKENNITGRLLLRDQDRLGIVSRGHITRQPIEKLTHDVNLPHFFPEI      | Xenopus laevis | 361 MSVYSLRKENNITGRLLLRDQDRLGIVSRGHITRQPIEKLTHDVNLPHFFPEI      |
| Xenopus laevis | 361 MSVYSLRKENNITGRLLLRDQDRLGIVSRGHITRQPIEKLTHDVNLPHFFPEI      |                |                                                                |
| Danio rerio    | 361 MSVYSLRKENNITGRLLLRDQDRLGIVSRGHITRQPIEKLTHDVNLPHFFPEI      |                |                                                                |
|                |                                                                |                |                                                                |
| Homo sapiens   | 421 IRDSAGEPEENE—RNVNLELVFGHRLGDFGQDKRWYME DGSVAIVIKDVTI       | Homo sapiens   | 421 IRDSAGEPEENE—RNVNLELVFGHRLGDFGQDKRWYME DGSVAIVIKDVTI       |
| Mus musculus   | 421 IRDSAGEPEENE—RNVNLELVFGHRLGDFGQDKRWYME DGSVAIVIKDVTI       | Mus musculus   | 421 IRDSAGEPEENE—RNVNLELVFGHRLGDFGQDKRWYME DGSVAIVIKDVTI       |
| Gallus gallus  | 421 IRDSAGEPEENE—RNVNLELVFGHRLGDFGQDKRWYME DGSVAIVIKDVTI       | Xenopus laevis | 421 IRDSAGEPEENE—RNVNLELVFGHRLGDFGQDKRWYME DGSVAIVIKDVTI       |
| Xenopus laevis | 421 IRDSAGEPEENE—RNVNLELVFGHRLGDFGQDKRWYME DGSVAIVIKDVTI       |                |                                                                |
| Danio rerio    | 421 IRDSAGEPEENE—RNVNLELVFGHRLGDFGQDKRWYME DGSVAIVIKDVTI       |                |                                                                |
|                |                                                                |                |                                                                |
| Homo sapiens   | 479 NNRLEPAILMTRKPPFVQKRWLVGAKSGTVECTIVYVSRIFSRPQVHSTQSRKIK    | Homo sapiens   | 479 NNRLEPAILMTRKPPFVQKRWLVGAKSGTVECTIVYVSRIFSRPQVHSTQSRKIK    |
| Mus musculus   | 479 NNRLEPAILMTRKPPFVQKRWLVGAKSGTVECTIVYVSRIFSRPQVHSTQSRKIK    | Mus musculus   | 479 NNRLEPAILMTRKPPFVQKRWLVGAKSGTVECTIVYVSRIFSRPQVHSTQSRKIK    |
| Gallus gallus  | 479 NNRLEPAILMTRKPPFVQKRWLVGAKSGTVECTIVYVSRIFSRPQVHSTQSRKIK    | Xenopus laevis | 479 NNRLEPAILMTRKPPFVQKRWLVGAKSGTVECTIVYVSRIFSRPQVHSTQSRKIK    |
| Xenopus laevis | 479 NNRLEPAILMTRKPPFVQKRWLVGAKSGTVECTIVYVSRIFSRPQVHSTQSRKIK    |                |                                                                |
| Danio rerio    | 479 NNRLEPAILMTRKPPFVQKRWLVGAKSGTVECTIVYVSRIFSRPQVHSTQSRKIK    |                |                                                                |
|                |                                                                |                |                                                                |
| Homo sapiens   | 539 PDEVRVQALATLTLTNSDENPGRSDSADQGLDRLRVAIASHTS—LQRSQ          | Homo sapiens   | 539 PDEVRVQALATLTLTNSDENPGRSDSADQGLDRLRVAIASHTS—LQRSQ          |
| Mus musculus   | 539 PDEVRVQALATLTLTNSDENPGRSDSADQGLDRLRVAIASHTS—LQRSQ          | Mus musculus   | 539 PDEVRVQALATLTLTNSDENPGRSDSADQGLDRLRVAIASHTS—LQRSQ          |
| Gallus gallus  | 539 PDEVRVQALATLTLTNSDENPGRSDSADQGLDRLRVAIASHTS—LQRSQ          | Xenopus laevis | 539 PDEVRVQALATLTLTNSDENPGRSDSADQGLDRLRVAIASHTS—LQRSQ          |
| Xenopus laevis | 539 PDEVRVQALATLTLTNSDENPGRSDSADQGLDRLRVAIASHTS—LQRSQ          |                |                                                                |
| Danio rerio    | 539 PDEVRVQALATLTLTNSDENPGRSDSADQGLDRLRVAIASHTS—LQRSQ          |                |                                                                |
|                |                                                                |                |                                                                |
| Homo sapiens   | 593 SN—PILGDFEFSHFDGDSYAAAVRRTQVVKIQVITR—VKSRSSEPTQYGRITKHS    | Homo sapiens   | 593 SN—PILGDFEFSHFDGDSYAAAVRRTQVVKIQVITR—VKSRSSEPTQYGRITKHS    |
| Mus musculus   | 593 SN—PILGDFEFVYFANQDSYAAAVRRTQVVKIQVITR—VKSRSSEPTQYGRITKHS   | Mus musculus   | 593 SN—PILGDFEFVYFANQDSYAAAVRRTQVVKIQVITR—VKSRSSEPTQYGRITKHS   |
| Gallus gallus  | 593 PHESTVSHYLPYLGSDSYAAAVRRTQVYVYHS—LSEGRSSSELSHSYRNL         | Xenopus laevis | 593 PHESTVSHYLPYLGSDSYAAAVRRTQVYVYHS—LSEGRSSSELSHSYRNL         |
| Xenopus laevis | 593 PHESTVSHYLPYLGSDSYAAAVRRTQVYVYHS—LSEGRSSSELSHSYRNL         |                |                                                                |
| Danio rerio    | 593 PHESTVSHYLPYLGSDSYAAAVRRTQVYVYHS—LSEGRSSSELSHSYRNL         |                |                                                                |
|                |                                                                |                |                                                                |
| Homo sapiens   | 651 HL—NRDSESSGNTDTSSEPRYSIDSRNRKVRGSSILNLSFGRYGRKSQRTSRGR     | Homo sapiens   | 651 HL—NRDSESSGNTDTSSEPRYSIDSRNRKVRGSSILNLSFGRYGRKSQRTSRGR     |
| Mus musculus   | 651 HL—NRDSESSGNTDTSSEPRYSIDSRNRKVRGSSILNLSFGRYGRKSQRTSRGR     | Mus musculus   | 651 HL—NRDSESSGNTDTSSEPRYSIDSRNRKVRGSSILNLSFGRYGRKSQRTSRGR     |
| Gallus gallus  | 651 HL—NRDSESSGNTDTSSEPRYSIDSRNRKVRGSSILNLSFGRYGRKSQRTSRGR     | Xenopus laevis | 651 HL—NRDSESSGNTDTSSEPRYSIDSRNRKVRGSSILNLSFGRYGRKSQRTSRGR     |
| Xenopus laevis | 651 HL—NRDSESSGNTDTSSEPRYSIDSRNRKVRGSSILNLSFGRYGRKSQRTSRGR     |                |                                                                |
| Danio rerio    | 651 HL—NRDSESSGNTDTSSEPRYSIDSRNRKVRGSSILNLSFGRYGRKSQRTSRGR     |                |                                                                |
|                |                                                                |                |                                                                |
| Homo sapiens   | 710 YPKRFFYVSGSLNPHQSGDFIKRSE—RDLQDTHTPKQPLHTRSRASEDKSVKSE     | Homo sapiens   | 710 YPKRFFYVSGSLNPHQSGDFIKRSE—RDLQDTHTPKQPLHTRSRASEDKSVKSE     |
| Mus musculus   | 710 YPKRFFYVSGSLNPHQSGDFIKRSE—RDLQDTHTPKQPLHTRSRASEDKSVKSE     | Mus musculus   | 710 YPKRFFYVSGSLNPHQSGDFIKRSE—RDLQDTHTPKQPLHTRSRASEDKSVKSE     |
| Gallus gallus  | 710 YPKRFFYVSGSLNPHQSGDFIKRSE—RDLQDTHTPKQPLHTRSRASEDKSVKSE     | Xenopus laevis | 710 YPKRFFYVSGSLNPHQSGDFIKRSE—RDLQDTHTPKQPLHTRSRASEDKSVKSE     |
| Xenopus laevis | 710 YPKRFFYVSGSLNPHQSGDFIKRSE—RDLQDTHTPKQPLHTRSRASEDKSVKSE     |                |                                                                |
| Danio rerio    | 710 YPKRFFYVSGSLNPHQSGDFIKRSE—RDLQDTHTPKQPLHTRSRASEDKSVKSE     |                |                                                                |
|                |                                                                |                |                                                                |
| Homo sapiens   | 768 HLEVEYRKRPHRP—SKARTNTERARDDREKRF—                          | Homo sapiens   | 768 HLEVEYRKRPHRP—SKARTNTERARDDREKRF—                          |
| Mus musculus   | 768 HLEVEYRKRPHRP—SKARTNTERARDDREKRF—                          | Mus musculus   | 768 HLEVEYRKRPHRP—SKARTNTERARDDREKRF—                          |
| Gallus gallus  | 768 HLEVEYRKRPHRP—SKARTNTERARDDREKRF—                          | Xenopus laevis | 768 HLEVEYRKRPHRP—SKARTNTERARDDREKRF—                          |
| Xenopus laevis | 768 HLEVEYRKRPHRP—SKARTNTERARDDREKRF—                          |                |                                                                |
| Danio rerio    | 768 HLEVEYRKRPHRP—SKARTNTERARDDREKRF—                          |                |                                                                |
