# Supplementary figures and images for: FOURIER TRANSFORM SPECTROMETRY: THE VISIBLE SPECTRUM OF YO
Source: Oxford University Press journal article supplement (doi:10.1242/dev.078675), 1977-01-01

**A**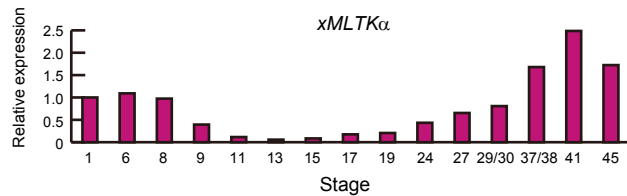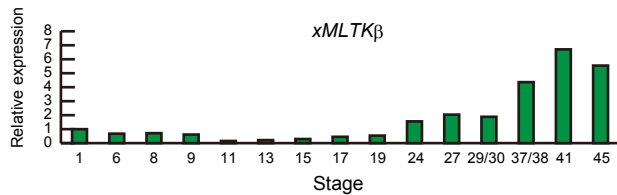**B**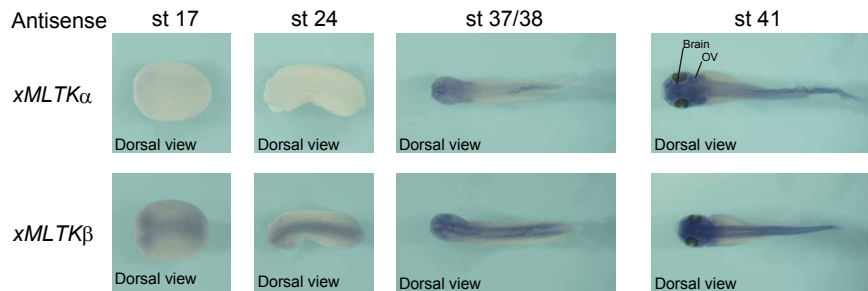**C**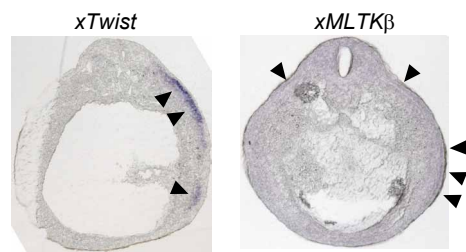

Supplement: dev078675figs2.pdf [file dev078675figs2.pdf]

**A**

|                     |   |   |   |   |   |   |   |   |   |
|---------------------|---|---|---|---|---|---|---|---|---|
| xMLTK $\alpha$ -myc | + | + | + | + | - | - | - | - | - |
| xMLTK $\beta$ -myc  | - | - | - | - | - | + | + | + | + |
| xMLTK-MO            | - | ▬ |   |   | - | - | ▬ |   |   |
| GFP                 | + | + | + | + | - | + | + | + | + |

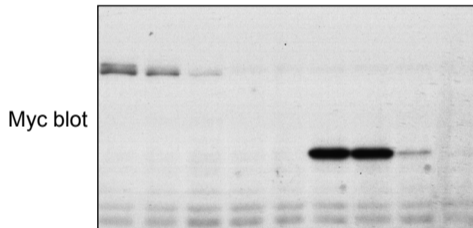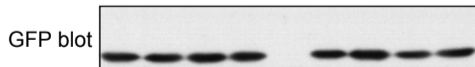**B**

|                         |   |   |   |   |
|-------------------------|---|---|---|---|
| xMLTK $\alpha$ -res-myc | + | + | - | - |
| xMLTK $\beta$ -res-myc  | - | - | + | + |
| xMLTK-MO                | - | + | - | + |
| GFP                     | + | + | + | + |

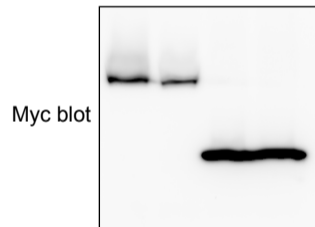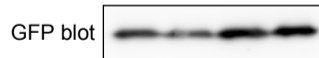

Supplement: dev078675figs3.pdf [file dev078675figs3.pdf]

**A** *xAgc1*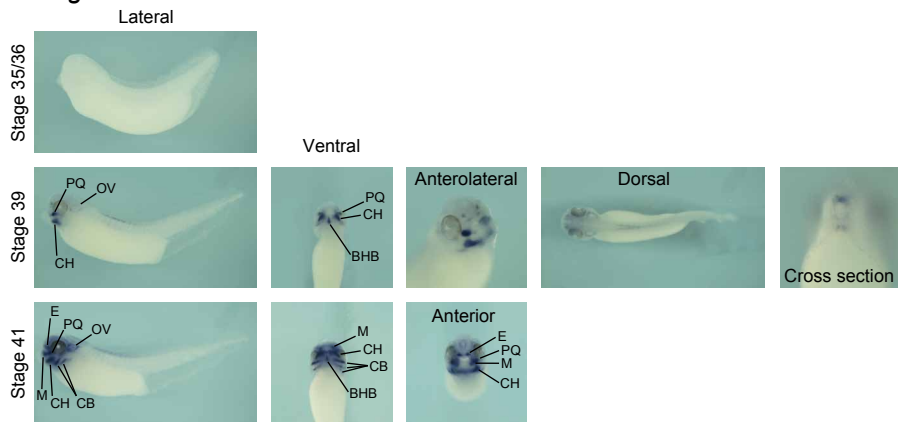**B** *xCrt1*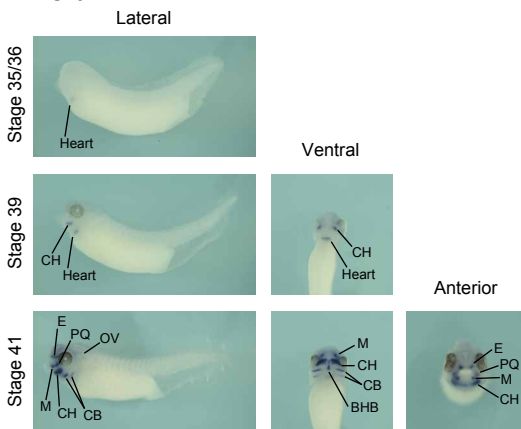**C** *xMatn1*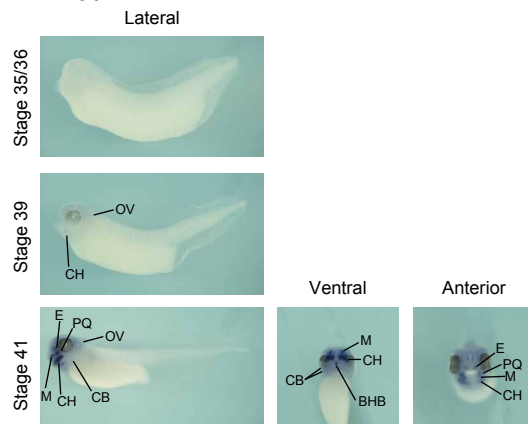**D** *xSox9*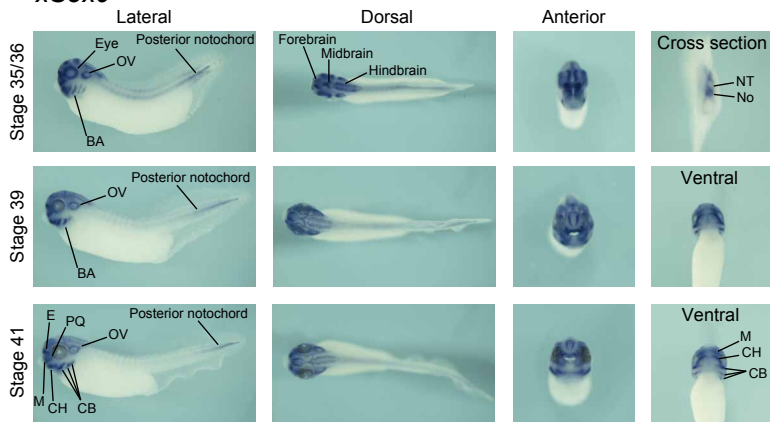

Supplement: dev078675figs4.pdf [file dev078675figs4.pdf]

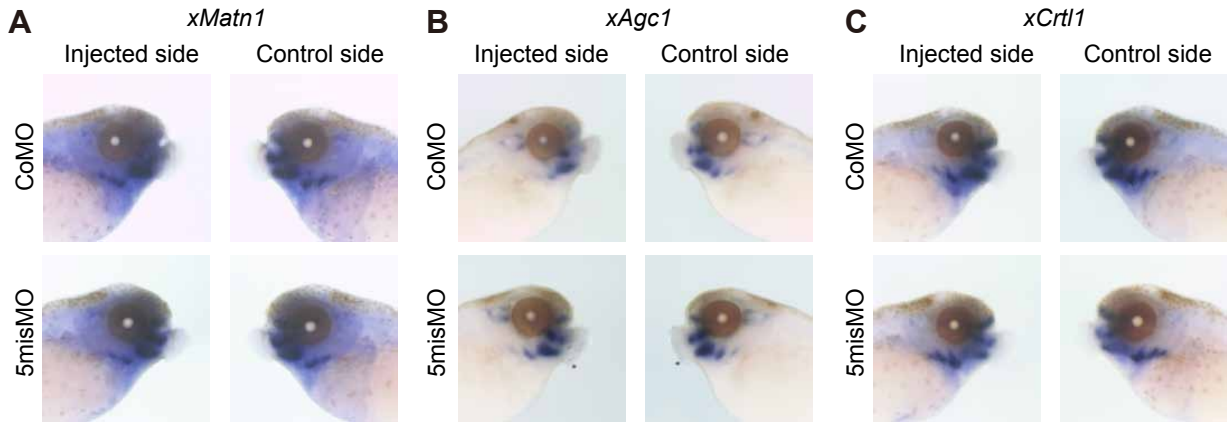

Supplement: dev078675figs5.pdf [file dev078675figs5.pdf]

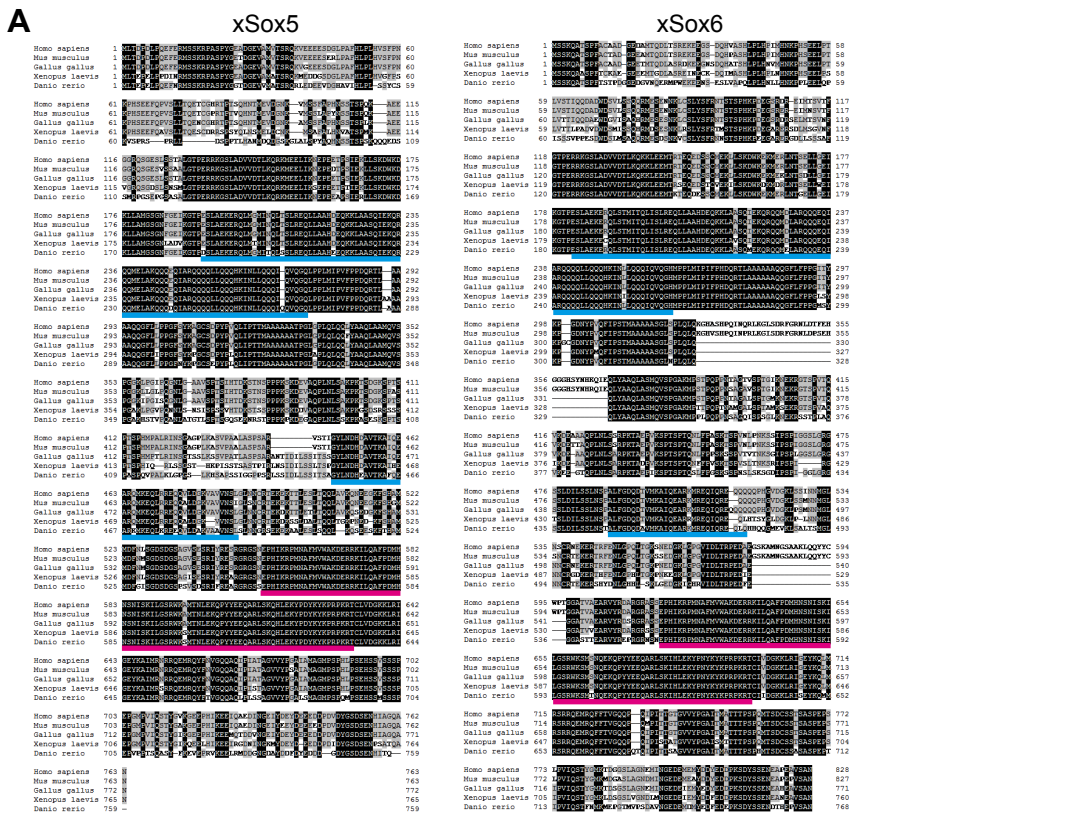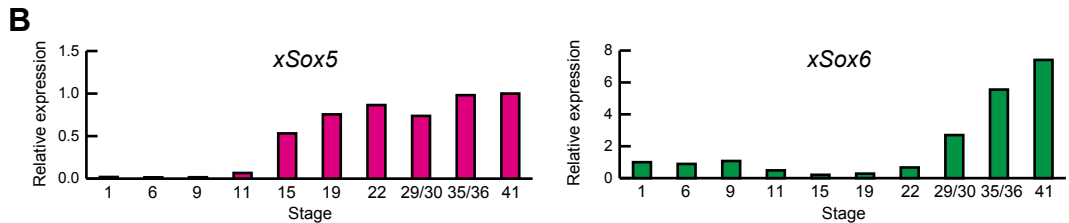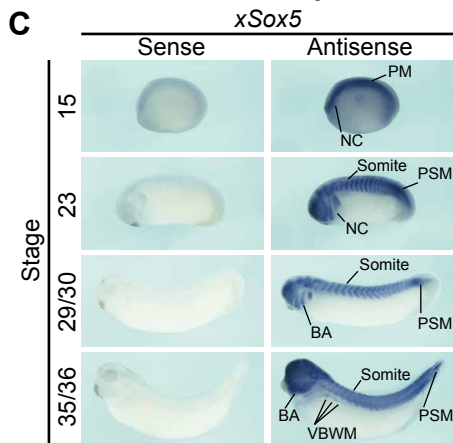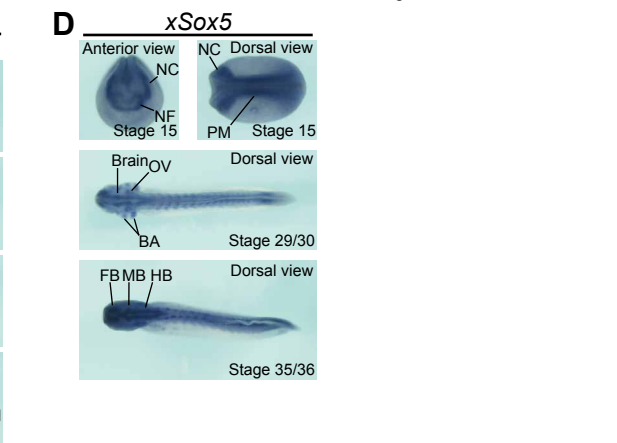

Supplement: dev078675figs6.pdf [file dev078675figs6.pdf]
